# Supplementary material
Source: MDPI journal article supplement (https://www.mdpi.com/2221-3759/11/4/39)
Supplement: s1 [file s1]

## Supplementary Figure S1

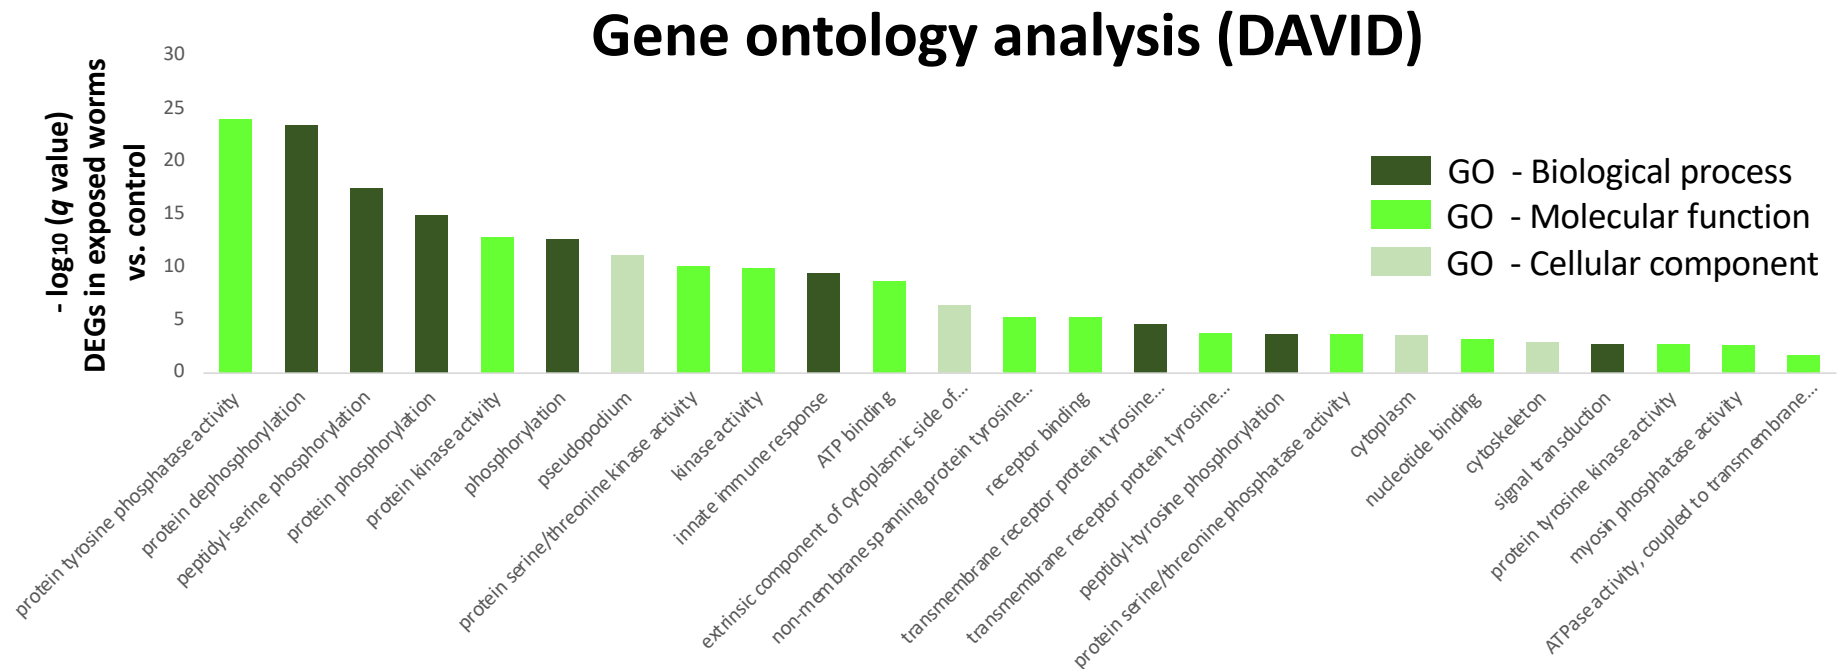

**Figure S1:** Histogram shows DAVID GO term functional analysis [33] (Huang et al., 2009) for DEGs in animals exposed to cyclobutrifluram compared with control non-exposed animals. Data are plotted as vertical bars that represent the significance of each GO-term. Adj. *P*-values (*q* values) were all significant ( $q \text{ value} \leq 0.05$ ) and correspond to Benjamini–Hochberg correction.
